# Supplementary material for: Field evaluation of the potential for avian exposure to clothianidin following the planting of clothianidin-treated corn seed
Source: PeerJ journal article supplement (doi:10.7717/peerj.5880), 2018-11-07

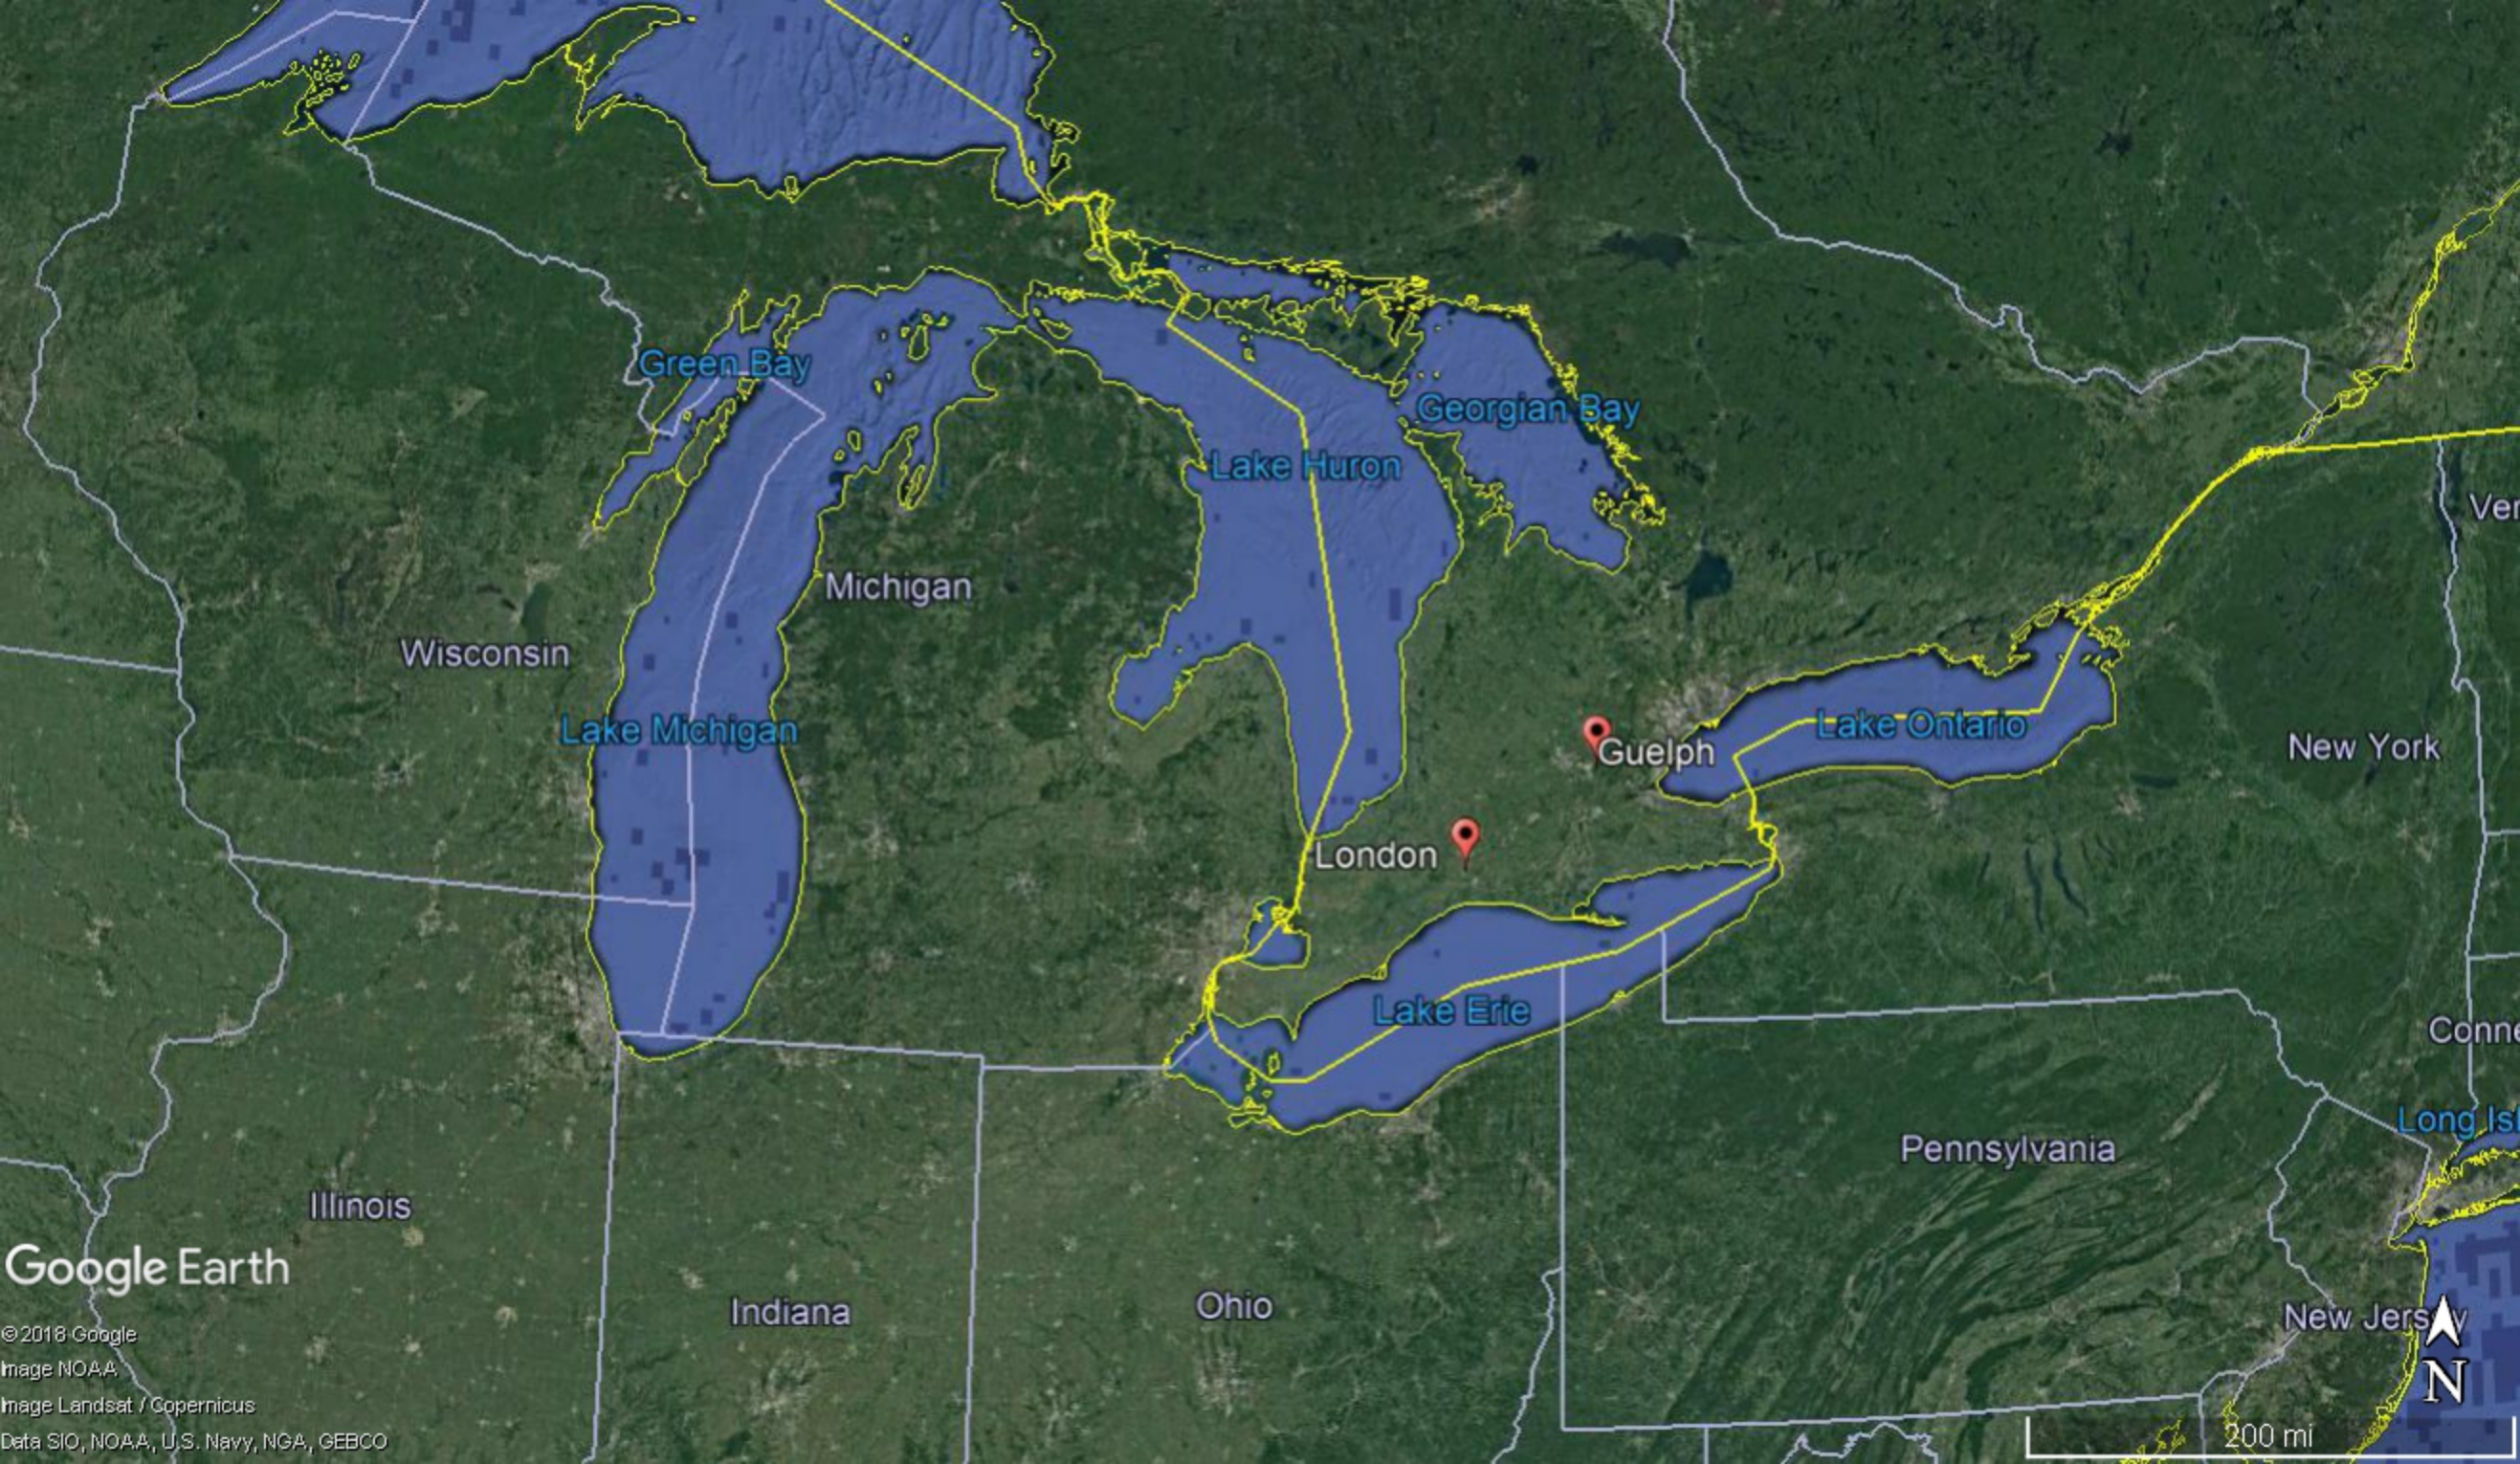

Green Bay

Georgian Bay

Lake Huron

Michigan

Wisconsin

Lake Michigan

Guelph

Lake Ontario

New York

London

Lake Erie

Illinois

Pennsylvania

Indiana

Ohio

New Jersey

Google Earth

© 2018 Google  
Image NOAA  
Image Landsat / Copernicus  
Data SIO, NOAA, U.S. Navy, NGA, GEBCO

200 mi

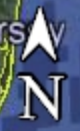

Supplement: 05_Supplemental_Figure_S1.pdf [file 05_Supplemental_Figure_S1.pdf]
