# Supplementary material for: Field evaluation of the potential for avian exposure to clothianidin following the planting of clothianidin-treated corn seed
Source: PeerJ. 2018 Nov 7;6:e5880. doi: 10.7717/peerj.5880 (PMC6228585; doi:10.7717/peerj.5880)
Supplement: Supplemental Information 2 [file peerj-06-5880-s002.xlsx]

## Sheet: S1
Table S1: Characteristics of seed counting transects on each study field
Fielda	Seed row length (m)	Row spacing	Total number of rows included in transect	Seed count transect area (ha)
		(cm)
L1	230	76.2	30	0.53
L2	300	48.3	50	0.73
L4	300	76.2	30	0.69
L5	300	76.2	30	0.69
L6	300	76.2	30	69
L7	400	48.3	30	0.57
L10	300	48.3	60	0.85
L11	300	76.2	30	0.69
L12	300	73.7	30	0.65
L13	276	76.2	30	0.65
L14	300	76.2	30	0.69
G1	250	73.7	30	0.57
G2	300	76.7	30	0.69
G3	300	76.7	30	0.69
G4	300	76.7	30	0.69
G5	250	76.7	30	0.57
G7	300	76.7	30	0.69
G10	250	76.7	30	0.57
G11	250	76.7	30	0.57
G12	250	76.7	30	0.57
G13	300	76.7	30	0.69
a L prefix = London area field, G prefix = Guelph area field

## Sheet: S2
Table S2. Observations from video recordings
Field	Planting Date	Video Monitored Area	Date	Day after planting	Length (hr:min)a	Seed Eaten (Yes/No)b
G2	2018-05-19	A	May 20-21	1	24	No
G2	2018-05-19	A	May 21-22	2	24	No
G2	2018-05-19	A	May 22-23	3	24	No
G2	2018-05-19	B	May 20-21	1	23:39:00	No
G2	2018-05-19	B	May 21-22	2	23:45:00	No
G2	2018-05-19	B	May 22-23	3	24	No
G3*	2018-05-20	A	May 22-23	2	24	No
G3*	2018-05-20	A	May 23-24	3	20:25:00	No
G3*	2018-05-20	B	May 22-23	2	24	No
G3*	2018-05-20	B	May 23-24	3	24	No
G4*	2018-05-17	A	May 19-20	2	24	No
G4*	2018-05-17	A	May 20-21	3	24	No
G4*	2018-05-17	A	May 21-22	4	22:50:00	No
G4*	2018-05-17	B	May 19-20	2	24	No
G4*	2018-05-17	B	May 20-21	3	24	No
G4*	2018-05-17	B	May 21-22	4	22:55:00	No
G7*	2018-05-20	A	May 24-25	4	23:15:00	No
G7*	2018-05-20	B	May 24-25	4	23	No
G13	2018-05-18	A	May 19-20	1	24	No
G13	2018-05-18	A	May 20-21	2	24	No
G13	2018-05-18	A	May 21-22	3	20:30:00	No
G13	2018-05-18	B	May 19-20	1	24	Noc
G13	2018-05-18	B	May 20-21	2	23:50:00	No
G13	2018-05-18	B	May 21-22	3	24	No
L1	2018-05-06	A	May 6-7	0	24	No
L1	2018-05-06	A	May 7-8	1	24	No
L1	2018-05-06	A	May 8-9	2	24	No
L1	2018-05-06	B	May 6-7	0	24	No
L1	2018-05-06	B	May 7-8	1	24	No
L1	2018-05-06	B	May 8-9	2	24	No
L2*	2018-05-13	A	May 13-14	0	24	No
L2*	2018-05-13	A	May 14-15	1	24	No
L2*	2018-05-13	A	May 15-16	2	24	No
L2*	2018-05-13	B	May 13-14	0	24	No
L2*	2018-05-13	B	May 14-15	1	24	No
L2*	2018-05-13	B	May 15-16	2	24	No
L4	2018-05-07	A	May 7-8	0	24	No
L4	2018-05-07	A	May 8-9	1	24	No
L4	2018-05-07	A	May 9-10	2	24	No
L4	2018-05-07	B	May 7-8	0	24	No
L4	2018-05-07	B	May 8-9	1	24	No
L4	2018-05-07	B	May 9-10	2	24	No
L10	2018-05-17	A	May 17-18	0	24	No
L10	2018-05-17	A	May 18-19	1	24	No
L10	2018-05-17	A	May 19-20	2	24	No
L10	2018-05-17	B	May 17-18	0	24	No
L10	2018-05-17	B	May 18-19	1	24	Yes
L10	2018-05-17	B	May 19-20	2	24	No
L10	2018-05-17	C	May 19-20	2	24	No
L11*	2018-05-07	A	May 7-8	0	24	No
L11*	2018-05-07	A	May 8-9	1	24	No
L11*	2018-05-07	A	May 9-10	2	24	No
L12*	2018-05-01	A	May 5-6	4	24	No
L12*	2018-05-01	B	May 5-6	4	24	No
L14	2018-05-20	A	May 20-21	0	24	Yes
L14	2018-05-20	A	May 21-22	1	24	No
L14	2018-05-20	B	May 20-21	0	24	No
L14	2018-05-20	B	May 21-22	1	24	Yes
Total					1380
a If time was not specified the tape was retrieved after it stopped indicating a full 24-hr session.
b Seed eaten or removed by visual inspection. Later verified by review of video.
c Seed not eaten but cracked open.
(*) denotes sites that experienced heavy rainfall within the three day post-planting period

## Sheet: S3
Table S3. Summary of avian observations across all 21 completely observable subplots from 06:30 to 08:30 a.m. for the first three consecutive days after planting.
Species observed	Genus/species	Occurrences	Detailed behavioral observations
(Common name)
European starling	Sturnus vulgaris	663	181
Common grackle	Quiscalus quiscula	334	118
Red-winged blackbird	Agelaius phoeniceus	160	73
American robin	Turdus migratorius	125	42
Horned lark	Eremophila alpestris	78	39
House sparrow	Passer domesticus	72	32
Brown-headed cowbird	Molothrus ater	71	21
American pipit	Anthus rubescens	66	19
American crow	Corvus brachyrhynchos	57	14
Rock pigeon	Columba livia	48	13
Savanah sparrow	Passerculus sandwichensis	34	10
Killdeer	Charadrius vociferus	28	7
Blue jay	Cyanocitta cristata	25	4
Song sparrow	Melospiza melodia	24	3
Canada gooose	Branta canadensis	22	3
Unknown sparrow	NA	13	3
Chipping sparrow	Spizella passerina	9	3
Northern cardinal	Cardinalis cardinalis	8	2
Cliff swallow	Petrochelidon pyrrhonota	7	1
Unknown bird	NA	6	1
Barn swallow	Hirundo rustica	4	1
Rusty blackbird	Euphagus carolinus	4	1
White-crowned sparrow	Zonotrichia leucophrys	4	1
Tree swallow	Tachycineta bicolor	3	1
American goldfinch	Spinus tristis	2	1
Eastern kingbird	Tyrannus tyrannus	2	1
Mallard	Anas platyrhynchos	2	1
Mourning dove	Zenaida macroura	2	-
Wood duck	Aix sponsa	2	-
Brown thrasher	Toxostoma rufum	1	-
Baltimore oriole	Icterus galbula	1	-
Gray cat bird	Dumetella carolinensis	1	-
Red-bellied woodpecker	Melanerpes carolinus	1	-
Turkey vulture	Cathartes aura	1	-
White-throated sparrow	Zonotrichia albicollis	1	-
Wild turkey	Meleagris gallopavo	1	-
Total		1882	596
NA = Not Applicable

## Sheet: S4
Table S4. Clothianidin avian acute oral toxicity
Species	Acute Oral LD50 (mg a.i./kg-bw)	EPA (2017) Study Classification	Reason for Classification
Northern bobwhite	>2000a	Acceptable	Clinical signs of toxicity were observed at all treatment groups except the lowest treatment level
(Colinus virginianus)	(14 day)
House sparrow	528a	Supplemental	Supplemental because clinical effects were observed in week 1 but not in week 2
(Passer domesticus)	(14 day)
Japanese quail	423a	Supplemental	Supplemental because Japanese quail were used as the test species
(Coturnix coturnix japonica)	(14 day)
Red-winged blackbird	414b	N/A	This endpoint was not assessed by EPA 2017
(Agelaius phoeniceus)	(14 day)
a Endpoints available from EPA (2017)
b Endpoints available from unpublished report submitted to the EPA with MRID number 49104801
