# Supplementary material for: Field evaluation of the potential for avian exposure to clothianidin following the planting of clothianidin-treated corn seed
Source: PeerJ. 2018 Nov 7;6:e5880. doi: 10.7717/peerj.5880 (PMC6228585; doi:10.7717/peerj.5880)
Supplement: Supplemental Information 3 [file peerj-06-5880-s003.xlsx]

## Sheet: S2
Table S2. Observations from video recordings
Field	Planting Date	Video Monitored Area	Date	Day after planting	Length (hr:min)a	Seed Eaten (Yes/No)b
G2	2018-05-19	A	May 20-21	1	24	No
G2	2018-05-19	A	May 21-22	2	24	No
G2	2018-05-19	A	May 22-23	3	24	No
G2	2018-05-19	B	May 20-21	1	23:39:00	No
G2	2018-05-19	B	May 21-22	2	23:45:00	No
G2	2018-05-19	B	May 22-23	3	24	No
G3*	2018-05-20	A	May 22-23	2	24	No
G3*	2018-05-20	A	May 23-24	3	20:25:00	No
G3*	2018-05-20	B	May 22-23	2	24	No
G3*	2018-05-20	B	May 23-24	3	24	No
G4*	2018-05-17	A	May 19-20	2	24	No
G4*	2018-05-17	A	May 20-21	3	24	No
G4*	2018-05-17	A	May 21-22	4	22:50:00	No
G4*	2018-05-17	B	May 19-20	2	24	No
G4*	2018-05-17	B	May 20-21	3	24	No
G4*	2018-05-17	B	May 21-22	4	22:55:00	No
G7*	2018-05-20	A	May 24-25	4	23:15:00	No
G7*	2018-05-20	B	May 24-25	4	23	No
G13	2018-05-18	A	May 19-20	1	24	No
G13	2018-05-18	A	May 20-21	2	24	No
G13	2018-05-18	A	May 21-22	3	20:30:00	No
G13	2018-05-18	B	May 19-20	1	24	Noc
G13	2018-05-18	B	May 20-21	2	23:50:00	No
G13	2018-05-18	B	May 21-22	3	24	No
L1	2018-05-06	A	May 6-7	0	24	No
L1	2018-05-06	A	May 7-8	1	24	No
L1	2018-05-06	A	May 8-9	2	24	No
L1	2018-05-06	B	May 6-7	0	24	No
L1	2018-05-06	B	May 7-8	1	24	No
L1	2018-05-06	B	May 8-9	2	24	No
L2*	2018-05-13	A	May 13-14	0	24	No
L2*	2018-05-13	A	May 14-15	1	24	No
L2*	2018-05-13	A	May 15-16	2	24	No
L2*	2018-05-13	B	May 13-14	0	24	No
L2*	2018-05-13	B	May 14-15	1	24	No
L2*	2018-05-13	B	May 15-16	2	24	No
L4	2018-05-07	A	May 7-8	0	24	No
L4	2018-05-07	A	May 8-9	1	24	No
L4	2018-05-07	A	May 9-10	2	24	No
L4	2018-05-07	B	May 7-8	0	24	No
L4	2018-05-07	B	May 8-9	1	24	No
L4	2018-05-07	B	May 9-10	2	24	No
L10	2018-05-17	A	May 17-18	0	24	No
L10	2018-05-17	A	May 18-19	1	24	No
L10	2018-05-17	A	May 19-20	2	24	No
L10	2018-05-17	B	May 17-18	0	24	No
L10	2018-05-17	B	May 18-19	1	24	Yes
L10	2018-05-17	B	May 19-20	2	24	No
L10	2018-05-17	C	May 19-20	2	24	No
L11*	2018-05-07	A	May 7-8	0	24	No
L11*	2018-05-07	A	May 8-9	1	24	No
L11*	2018-05-07	A	May 9-10	2	24	No
L12*	2018-05-01	A	May 5-6	4	24	No
L12*	2018-05-01	B	May 5-6	4	24	No
L14	2018-05-20	A	May 20-21	0	24	Yes
L14	2018-05-20	A	May 21-22	1	24	No
L14	2018-05-20	B	May 20-21	0	24	No
L14	2018-05-20	B	May 21-22	1	24	Yes
Total					1380
a If time was not specified the tape was retrieved after it stopped indicating a full 24-hr session.
b Seed eaten or removed by visual inspection. Later verified by review of video.
c Seed not eaten but cracked open.
(*) denotes sites that experienced heavy rainfall within the three day post-planting period
