# Supplementary material for: Field evaluation of the potential for avian exposure to clothianidin following the planting of clothianidin-treated corn seed
Source: PeerJ. 2018 Nov 7;6:e5880. doi: 10.7717/peerj.5880 (PMC6228585; doi:10.7717/peerj.5880)
Supplement: Supplemental Information 5 [file peerj-06-5880-s005.xlsx]

## Sheet: S4
Table S4. Clothianidin avian acute oral toxicity
Species	Acute Oral LD50 (mg a.i./kg-bw)	EPA (2017) Study Classification	Reason for Classification
Northern bobwhite	>2000a	Acceptable	Clinical signs of toxicity were observed at all treatment groups except the lowest treatment level
(Colinus virginianus)	(14 day)
House sparrow	528a	Supplemental	Supplemental because clinical effects were observed in week 1 but not in week 2
(Passer domesticus)	(14 day)
Japanese quail	423a	Supplemental	Supplemental because Japanese quail were used as the test species
(Coturnix coturnix japonica)	(14 day)
Red-winged blackbird	414b	N/A	This endpoint was not assessed by EPA 2017
(Agelaius phoeniceus)	(14 day)
a Endpoints available from EPA (2017)
b Endpoints available from unpublished report submitted to the EPA with MRID number 49104801
