# Supplementary material for: Field evaluation of the potential for avian exposure to clothianidin following the planting of clothianidin-treated corn seed
Source: PeerJ. 2018 Nov 7;6:e5880. doi: 10.7717/peerj.5880 (PMC6228585; doi:10.7717/peerj.5880)
Supplement: Supplemental Information 8 [file peerj-06-5880-s008.xlsx]

## Sheet: Raw data_Planting Dates
Raw Data Table S7. Planting dates, types of planters used on London and Guelph area study sites in 2004
Study Site Numbera	Planting Date	Type of Planter
L-1	2018-05-07	Kinze 2210
L-2	2018-05-13	John Deere 175
L-4	2018-05-07	John Deere 7000
L-5	2018-05-04	John Deere 7000
L-6	2018-06-02	John Deere 1770
L-7	2018-05-01	John Deere 1770
L-10	2018-05-17	John Deere 7000
L-11	2018-05-17	John Deere 7000
L-12	2018-05-01	John Deere 1780
L-13	2018-05-19	John Deere 1780
L-14	2018-05-20	John Deere
G-1	2018-05-13	John Deere
G-2	2018-05-19	White 6100
G-3	2018-05-20	John Deere
G-4	2018-05-17	John Deere
G-5	2018-05-17	John Deere
G-7	2018-05-20	John Deere
G-10	2018-06-07	John Deere
G-11	2018-05-13	Case/International 1200
G-12	2018-05-17	John Deere
G-13	2018-05-18	John Deere
aL = London area sites G = Guelph area sites
